# Supplementary material
Source: PubMed Central journal article supplement (PMC5247490)
Supplement: rspb20161868supp1.pdf [file rspb20161868supp1.pdf]

Ivy CM, Robertson CE, Bernier NJ 2016 Acute embryonic anoxia exposure favors the development of a dominant and aggressive phenotype in adult zebrafish. Proc. R. Soc. B. (doi: 10.1098/rspb.2016.1868).

### Electronic Supplementary Materials

**Table S1** Sequences of primer pairs used in real-time reverse transcriptase-polymerase chain reaction assays.

| Gene          | Primer Sequence (5'to 3')                                | Accession # | Efficiency (%) |        |
|---------------|----------------------------------------------------------|-------------|----------------|--------|
|               |                                                          |             | ovary          | testes |
| <i>cyp19a</i> | F: GCT GAC GGA TGC TCA AGG A<br>R: CCA CGA TGC GCA GTA   | AF226620    | 97.7           | 91.6   |
| <i>ef1α</i>   | F: GGG CAA GGG CTC CTT CAA<br>R: CGC TCG GCC TTC AGT TTG | NM131263    | 102.6          | 98.8   |

*cyp19a*, gonadal aromatase; *ef1α*, elongation factor 1α; F, forward primer; R, reverse primer
