# Supplementary material
Source: PubMed Central journal article supplement (PMC5247490)
Supplement: rspb20161868supp2.pdf [file rspb20161868supp2.pdf]

Ivy CM, Robertson CE, Bernier NJ 2016 Acute embryonic anoxia exposure favors the development of a dominant and aggressive phenotype in adult zebrafish. Proc. R. Soc. B. (doi: 10.1098/rspb.2016.1868).

### Electronic Supplementary Materials

**Table S2.** Whole-body cortisol (ng/g BW) separated by sex within normoxia- and anoxia-treated zebrafish. Data are mean  $\pm$  s.e.m.

| Experiment                       | Treatment         | Normoxia         |                  | Anoxia           |                  |
|----------------------------------|-------------------|------------------|------------------|------------------|------------------|
|                                  |                   | Males            | Females          | Males            | Females          |
| Adult hypoxia exposure           | Normoxia exposure | 6.98 $\pm$ 1.94  | 5.00 $\pm$ 2.18  | 6.60 $\pm$ 1.55  | 4.10 $\pm$ 1.33  |
|                                  | Hypoxia exposure  | 16.22 $\pm$ 4.79 | 16.28 $\pm$ 5.24 | 15.85 $\pm$ 2.65 | 18.86 $\pm$ 6.78 |
| Adult dyadic social interactions |                   | 15.91 $\pm$ 2.74 | 21.00 $\pm$ 9.79 | 6.95 $\pm$ 1.91  | 5.47 $\pm$ 2.26  |
