# Supplementary material
Source: PubMed Central journal article supplement (PMC5247490)
Supplement: rspb20161868supp3.pdf [file rspb20161868supp3.pdf]

Ivy CM, Robertson CE, Bernier NJ 2016 Acute embryonic anoxia exposure favors the development of a dominant and aggressive phenotype in adult zebrafish. Proc. R. Soc. B. (doi: 10.1098/rspb.2016.1868).

### Electronic Supplementary Materials

**Table S3.** Quantification of behaviours separated by sex within normoxia- and anoxia-treated zebrafish. Data are mean  $\pm$  s.e.m.

| Experiment                       | Treatment                       | Normoxia          |                    | Anoxia            |                   |
|----------------------------------|---------------------------------|-------------------|--------------------|-------------------|-------------------|
|                                  |                                 | Males             | Females            | Males             | Females           |
| Adult dyadic social interactions | Chases initiated                | 8.2 $\pm$ 4.4     | 4.7 $\pm$ 2.9      | 51.3 $\pm$ 19.0   | 57.5 $\pm$ 5.7    |
|                                  | Bites given                     | 99.0 $\pm$ 44.2   | 92.3 $\pm$ 60.6    | 349.3 $\pm$ 108.1 | 504 $\pm$ 126.1   |
|                                  | Freezes entered                 | 43.0 $\pm$ 15.7   | 40.0 $\pm$ 12.2    | 10.2 $\pm$ 9.4    | 6.0 $\pm$ 3.6     |
| Adult mirror aggression test     | Bites at mirror                 | 168.5 $\pm$ 28.0  | 194.3 $\pm$ 70.0   | 273.5 $\pm$ 151.5 | 306.0 $\pm$ 49.3  |
|                                  | Parallel mirror inspections     | 41.4 $\pm$ 7.7    | 61.2 $\pm$ 10.5    | 33.0 $\pm$ 12.4   | 50.6 $\pm$ 7.9    |
|                                  | Time in mirror zone (s)         | 412.9 $\pm$ 157.9 | 289.9 $\pm$ 82.8   | 370.2 $\pm$ 128.5 | 447.6 $\pm$ 75.0  |
|                                  | Time in intermediate zone (s)   | 515.5 $\pm$ 151.9 | 455.84 $\pm$ 123.0 | 482.1 $\pm$ 145.9 | 546.2 $\pm$ 106.8 |
|                                  | Time in back zone (s)           | 571.7 $\pm$ 159.2 | 754.4 $\pm$ 163.6  | 647.8 $\pm$ 182.6 | 515.6 $\pm$ 103.7 |
|                                  | Time spent moving (s)           | 648.4 $\pm$ 164.7 | 732.5 $\pm$ 184.3  | 619.5 $\pm$ 157.3 | 692.2 $\pm$ 128.1 |
|                                  | Time spent not moving (s)       | 851.6 $\pm$ 164.7 | 767.6 $\pm$ 184.3  | 854.8 $\pm$ 383.1 | 718.7 $\pm$ 146.4 |
| Adult light/dark tank test       | Zone transitions                | 23.6 $\pm$ 3.7    | 32.8 $\pm$ 8.1     | 21.7 $\pm$ 4.8    | 16.0 $\pm$ 4.7    |
|                                  | Latency to enter light zone (s) | 58.1 $\pm$ 23.2   | 83.7 $\pm$ 52.7    | 58.6 $\pm$ 29.9   | 85.9 $\pm$ 42.9   |
|                                  | Duration in light zone (%)      | 10.2 $\pm$ 2.5    | 19.4 $\pm$ 8.8     | 13.2 $\pm$ 5.9    | 8.8 $\pm$ 3.2     |
